# Supplementary material
Source: Springer Nature journal article supplement (https://www.springermedizin.de/resource/supplementary/12913_2009_1144_MOESM1_ESM.pdf/9528386)
Supplement: MOESM1 [file 9528386]

# Enlist Patient

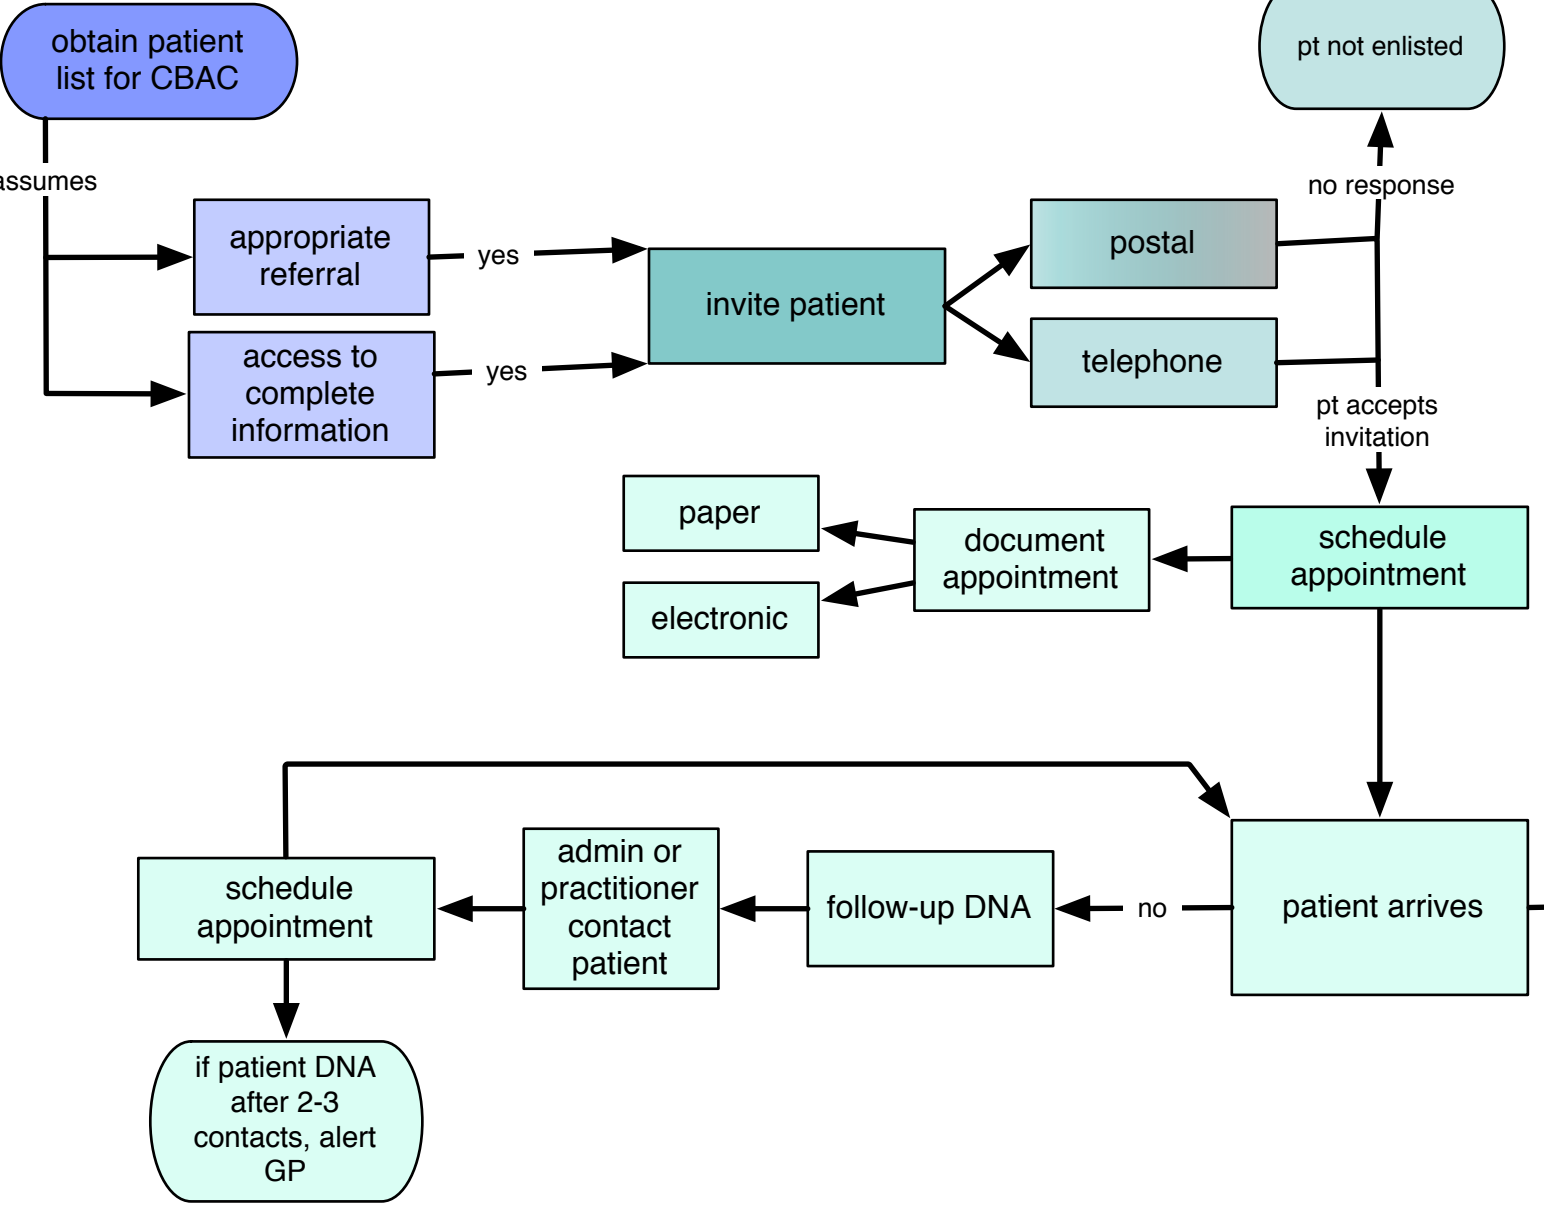

# Monitor Patient

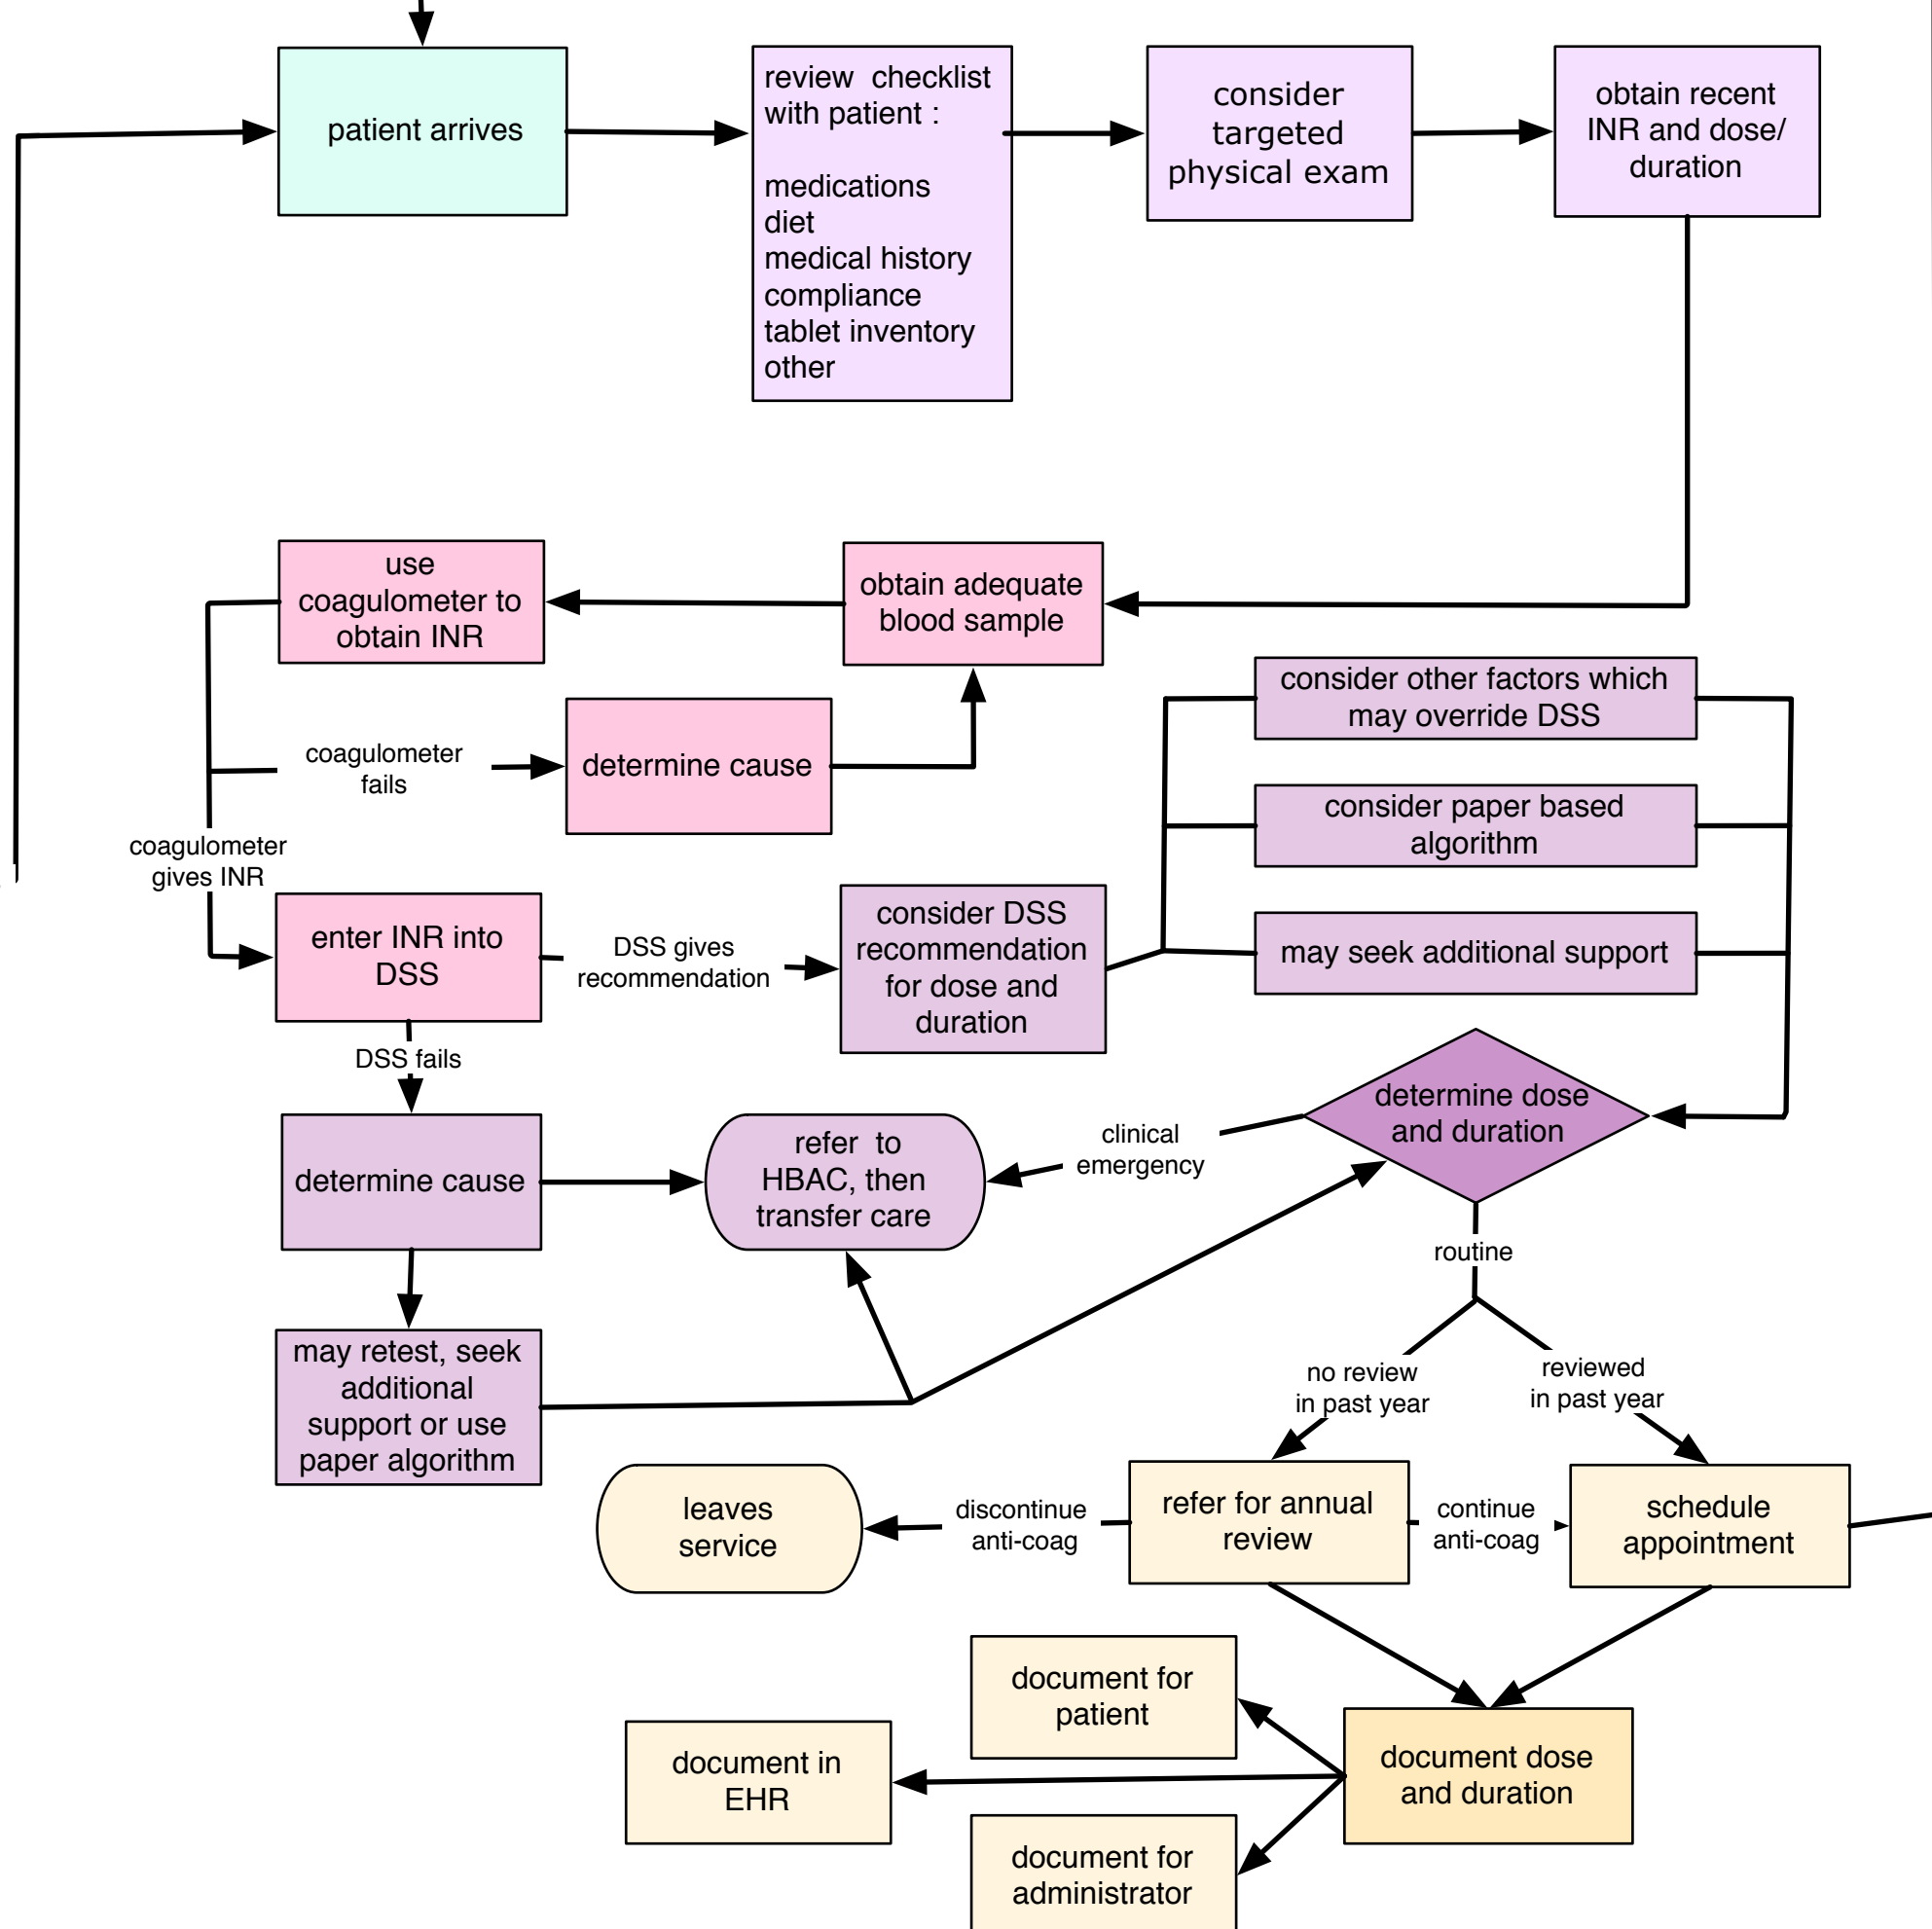

**Key to symbols used in Sequential Flow Diagram:**

- PROCESS FLOW DEPENDING ON OUTCOME →
- PROCESS BEGINNING AND END
- ACTIVITY STEP
- ◇ DECISION POINT
